# Supplementary material for: Three-Year Clinical Results of a Cruciate-Retaining Type of the Knee Prosthesis with Anatomical Geometry Developed in Japan
Source: Research Square preprint supplement (doi:10.21203/rs.3.rs-107082/v1), 2020-11-24
Supplement: Supplementary file 1 [file 1476fedf0801efb3019e42ac.xlsx]

## Sheet: Sheet1
Table 2. Summary of ROM and KSS
	Preoperative	Postoperative 3-year	P-value
ROM, degree (SD)	110 (19.8)	123 (14.4)	<0.001
KSS-KS (SD)	43.5 (14.5)	97.2 (4.90)	<0.001
KSS-FS (SD)	40.0 (19.5)	76.0 (18.8)	<0.001
Extension, degree (SD)	-10.1 (9.94)	-0.78 (3.21)	<0.001
Flexion, degree (SD)	120 (14.3)	124 (13.3)	0.003
ROM, range of motion; KSS, Knee Society Score; KS, Knee score; FS, Function score; SD, standard deviation
