# Supplementary material for: Three-Year Clinical Results of a Cruciate-Retaining Type of the Knee Prosthesis with Anatomical Geometry Developed in Japan
Source: Research Square preprint supplement (doi:10.21203/rs.3.rs-107082/v1), 2020-11-24
Supplement: Supplementary file 2 [file 25e7545c48c4e2c8fe15fddc.xlsx]

## Sheet: Sheet1
Table 1. Summary of demographic data for patients included in this study
Mean age at surgery, yrs (range)	72.3 (29-89)
Gender, female/male	102/9
Disease, OA/RA/ON	112/7/3
Mean height at surgery (range)	153 (136-173)
Mean weight at surgery (range)	63.4 (33.9-97.5)
Mean BMI at surgery (range)	27.2 (16.7-39.6)
Mean preoperative standing FTA, degree (range)	185 (152-209)
Mean preoperative HKA angle (range)	11.9 (0-35)
Mean operation time, min (range)	125 (89-185)
Patellar replacement, yes/no	80/42
OA, osteoarthritis; RA, rheumatoid arthritis; ON, osteonecrosis; BMI, body mass index; FTA, femorotibial angle; HKA, hip-knee-ankle. Varus mechanical alignment is designated as positive for HKA angle.
