# Supplementary material for: Three-Year Clinical Results of a Cruciate-Retaining Type of the Knee Prosthesis with Anatomical Geometry Developed in Japan
Source: Research Square preprint supplement (doi:10.21203/rs.3.rs-107082/v1), 2020-11-24
Supplement: Supplementary file 3 [file 2fabcbbf018de93b1b54e8b8.xlsx]

## Sheet: Sheet1
Table 6. Summary of intra- and post-operative complications in 3 years after CR-FINE TKA
Complications	n (%)	Notes
Major complications
Suspicious deep infection	1 (0.8)	No bacteria detected, not revised
Minor complications
Anterior notching	4 (3.3)	No fracture
Popliteus tendon tear	5 (4.1)	All sutured
MCL tear	1 (0.8)	Sutured
Lateral epicondyle fracture	1 (0.8)
Peroneal nerve palsy	1 (0.8)	Full recovery
MCL, medial collateral ligament
