# Supplementary material for: Three-Year Clinical Results of a Cruciate-Retaining Type of the Knee Prosthesis with Anatomical Geometry Developed in Japan
Source: Research Square preprint supplement (doi:10.21203/rs.3.rs-107082/v1), 2020-11-24
Supplement: Supplementary file 4 [file 4fc7ded3363307f0d0d22291.xlsx]

## Sheet: Sheet1
Table 4. Correlations among postoperative KSS, KOOS and FJS
	Extension	Flexion	ROM	KSS-KS	KSS-FS	KOOS-symptom	KOOS-pain	KOOS-ADL	KOOS-sports	KOOS-QOL	FJS
Extension		-0.230*	-0.436**	-0.325**	-0.169	-0.145	-0.068	-0.187*	-0.310*	-0.175	-0.177
Flexion			0.976**	0.465**	0.097	-0.086	-0.031	0.055	0.086	-0.019	-0.016
ROM				0.503**	0.127	-0.047	-0.014	0.092	0.159	0.021	0.007
KSS-KS					0.165	0.235**	0.451**	0.385**	0.319*	0.294**	0.289
KSS-FS						0.202*	0.212*	0.432**	0.579**	0.362**	0.240*
KOOS-symptom							0.671**	0.614**	0.367**	0.539**	0.563**
KOOS-pain								0.739**	0.447**	0.561**	0.596**
KOOS-ADL									0.657**	0.642**	0.653**
KOOS-sports										0.619**	0.344*
KOOS-QOL											0.633**
FJS
ROM, range of motion; KSS, Knee Society Score; KS, Knee score; FS, Function score; KOOS, Knee Injury and Osteoarthritis Outcome Score; FJS, Forgotten Joint Score. *P<0.05, **P<0.01.
