# Supplementary material for: Three-Year Clinical Results of a Cruciate-Retaining Type of the Knee Prosthesis with Anatomical Geometry Developed in Japan
Source: Research Square preprint supplement (doi:10.21203/rs.3.rs-107082/v1), 2020-11-24
Supplement: Supplementary file 6 [file b3eca42883d2f25d4c6eace4.xlsx]

## Sheet: Sheet1
Table 3. Summary of patient-reported outcomes (PROs)
	Preoperative	Postoperative 3-year	P-value
Mean KOOS-symptom (SD)	48.0 (18.9)	85.3 (13.7)	<0.001
Mean KOOS-pain (SD)	42.3 (18.4)	89.4 (12.8)	<0.001
Mean KOOS-ADL (SD)	58.5(16.1)	85.7 (13.3)	<0.001
Mean KOOS-sports (SD)	21.1 (15.1)	53.5 (28.7)	<0.001
Mean KOOS-QOL (SD)	26.1 (14.3)	70.5 (20.7)	<0.001
Mean FJS (SD)	-	66.2 (23.8)	-
KOOS, Knee Injury and Osteoarthritis Outcome Score; FJS, Forgotten Joint Score; SD, standard deviation
